# Supplementary material for: Spatially resolved transcriptomic profiling of degraded and challenging fresh frozen samples
Source: PubMed Central journal article supplement (PMC9889806; doi:10.1038/s41467-023-36071-5), 2023-01-31
Supplement: 41467_2023_36071_MOESM3_ESM.pdf [file 41467_2023_36071_MOESM3_ESM.pdf]

**Descriptions of additional supplementary files**

Supplementary Data 1: Table with sample metadata

Supplementary Video 1: Tissue detachment
